# Supplementary material for: Correlation-based radio localization in an indoor environment
Source: Springer Nature journal article supplement (doi:10.1186/1687-1499-2011-135), 2011-10-21
Supplement: 13638_2010_135_MOESM9_ESM.pdf [file 13638_2010_135_MOESM9_ESM.pdf]

Localization with MDS and Statistical Peak Selection

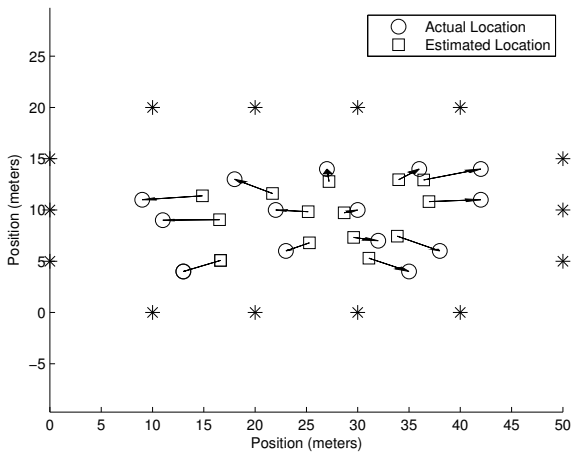

(a) Full

Localization with MDS and Statistical Peak Selection

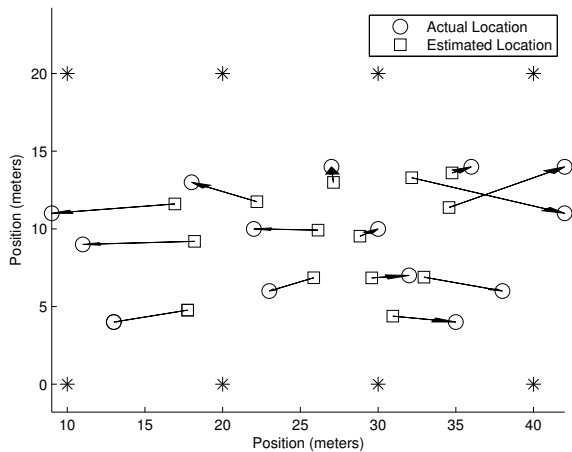

(b) Top and Bottom

Localization with MDS and Statistical Peak Selection

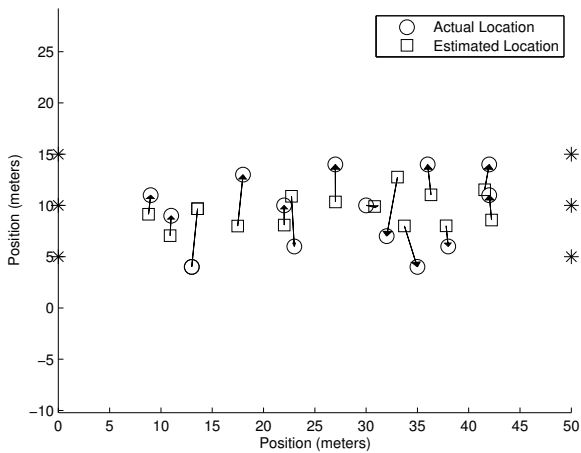

(c) Left and Right

Localization with MDS and Statistical Peak Selection

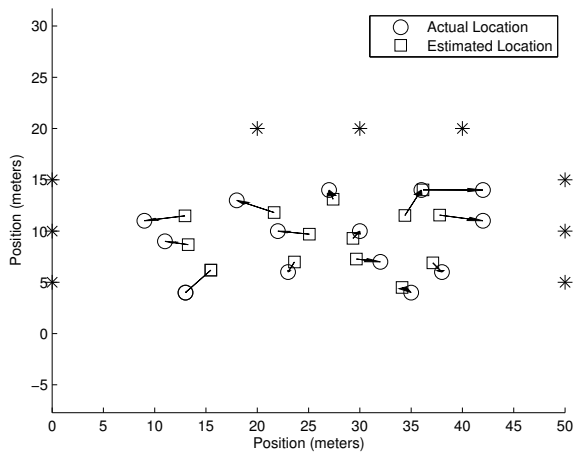

(d) Best
