# Supplementary material for: Correlation-based radio localization in an indoor environment
Source: Springer Nature journal article supplement (doi:10.1186/1687-1499-2011-135), 2011-10-21

## 2nd order Methods

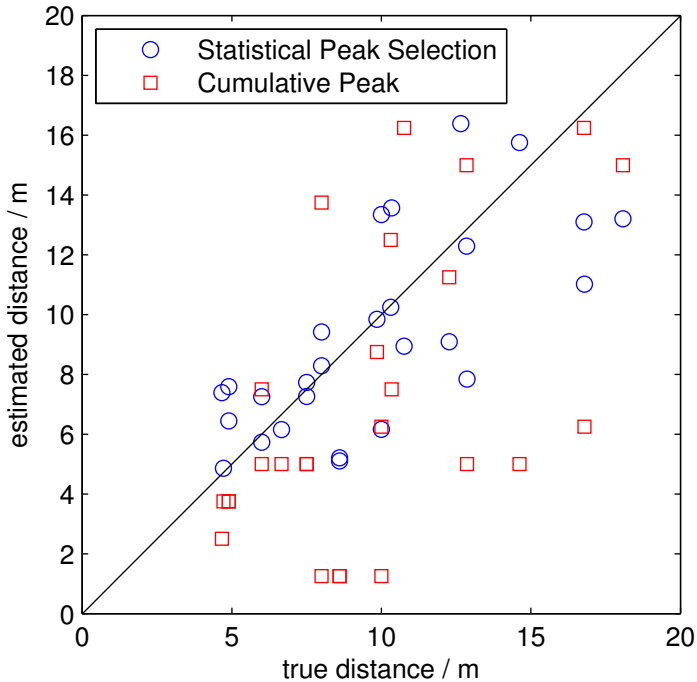

Supplement: 13638_2010_135_MOESM11_ESM.pdf [file 13638_2010_135_MOESM11_ESM.pdf]
